# Supplementary material for: Bridging Tumor Growth Dynamics and Survival in Preclinical Oncology Drug Development – A Translational Tumor Growth Inhibition and Time to Event (TGI-TTE) Modeling Framework
Source: Research Square preprint supplement (doi:10.21203/rs.3.rs-9400841/v1), 2026-04-23
Supplement: Supplementary file 1 [file add18a1ad8f4845ca9b7832a.docx]

**Supplementary Materials**

**Bridging Tumor Growth Dynamics and Survival in Preclinical Oncology Drug Development – A Translational Tumor Growth Inhibition and Time to Event (TGI-TTE) Modeling Framework**

Kumar Kulldeep Niloy1,2, Jamie Horn1, Nazmul Hasan Bhuiyan3,4, Suhas S Bhosale3,4, Khaled A Shaaban3,4, Thomas Prisinzano3,4, Jon S Thorson3,4, Jurgen Rohr3, Markos Leggas1

1Department of Pharmacy and Pharmaceutical Sciences, St. Jude Children’s Research Hospital, Memphis, Tennessee, United States

2Department of Pharmaceutical Sciences, College of Pharmacy, The University of Tennessee Health Science Center, Memphis, Tennessee, United States

3Department of Pharmaceutical Sciences, College of Pharmacy, University of Kentucky, Lexington, Kentucky, United States

4Center for Pharmaceutical Research and Innovation, College of Pharmacy, University of Kentucky, Lexington, Kentucky, United States

**Table S1.** Summary of the TTE dataset

| **Experiment** | **Treatment**  **groups** | **Group size** | **No. of events** | **No. of censored events** |
| --- | --- | --- | --- | --- |
| 1 | Vehicle | 7 | 7 | 0 |
| 0.3 mg/kg Q1dx5 | 9 | 9 | 0 |
| 0.6 mg/kg Q1dx5 | 10 | 10 | 0 |
| 0.9 mg/kg Q1dx5 | 15 | 12 | 3 |
| 2 | Vehicle | 6 | 5 | 1 |
| 2.40 mg/kg Q3dx6 | 4 | 2 | 2 |
| 3 | 2.40 mg/kg Q3dx6 | 4 | 4 | 0 |
| 2.85 mg/kg BIWx6 | 7 | 5 | 2 |
|  | **Total** | **62** | **54** | **8** |

**Table S2.** Natural tumor growth model selection

| **Model** | **AIC** |
| --- | --- |
| Simeoni | 6670.90 |
| Koch | 6685.29 |
| Quadratic | 6696.32 |
| Exponential | 7031.07 |

**Table S3.** Drug effect parameterization

| **Equation** | **Description** | **Comment** |
| --- | --- | --- |
|  | Linear | Precise parameter estimation |
|  | Michaelis-Menten; IIV on and | RSE>50% for |
| Michaelis-Menten; IIV on | Convergence issue as number of iterations increases |
| Michaelis-Menten; IIV on | Convergence issue as number of iterations increases |
| Michaelis-Menten; no IIV | RSE>50% for |
|  | Michaelis-Menten with hill coefficient | Over-parametrized; is unidentifiable |

**Table S4.** Base TTE model selection

| **Model** | **AIC** |
| --- | --- |
| Log-logistic | 866.24 |
| Weibull | 873.64 |
| Gompertz | 884.58 |
| Exponential | 895.12 |

**Table S5.** Base TTE model parameters

| **Parameter** | **Definition** | **Typical estimate**  **(%RSE)** | **IIV**  **(%CV)** | **Bootstrap-derived median**  **(95% CI)** |
| --- | --- | --- | --- | --- |
|  | Scale | 1132.66 (7.97) | 0.42 (44.18) | 1127.63 (1017.88 – 1280.11) |
|  | Shape | 4 (fixed) | - | - |

**Note:** During base TTE model development, exploratory estimation of the shape parameter, s, yielded an inestimable standard error, indicating that s is not identifiable. To ensure model stability, s was fixed to an empirical value of 4. In the log-logistic distribution, s>1 ensures a unimodal hazard function and is biologically plausible in parametric survival analysis [1].

**Table S6.** Covariate modeling of final TTE model

| **Step** | **Description** | **-2LL** | **Comment** |
| --- | --- | --- | --- |
| 1 | Base TTE model | 861.71 | Precise parameter estimation |
| 2 | Base TTE model + | 800.11 | Precise parameter estimation |
| 3 | Base TTE model + | 857.46 | Precise parameter estimation |
| 4 | Base TTE model + | 857.39 | Precise parameter estimation |
| 5 | Base TTE model + | 819.21 | RSE > 50% for |
| 6 | Base TTE model + + | 779.32 | RSE > 50% for and |
| 7 | Base TTE model + + | 798.48 | RSE > 50% for and |
| 8 | Base TTE model + + | 799.83 | RSE > 50% for and |
| 9 | Base TTE model + + | 807.05 | Precise parameter estimation |
| 10 | Base TTE model + + | 854.87 | RSE > 50% for |
| **11 (Final)** | **Base TTE model + + +** | **773.96** | **Precise parameter estimation** |
| 12 | Base TTE model + + + | 798.04 | RSE > 50% for and |

**Reference**

1. Gupta RC, Akman O, Lvin S (1999) A Study of Log-Logistic Model in Survival Analysis. Biom J 41 (4):431-443. doi:10.1002/(SICI)1521-4036(199907)41:4<431::AID-BIMJ431>3.0.CO;2-U
